# Supplementary material for: How does calcium drive the structural organization of iron–organic matter aggregates? A multiscale investigation
Source: Royal Society of Chemistry journal article supplement (doi:10.1039/d0en00412j), 2020-01-01
Supplement: d0en00412j4.pdf [file d0en00412j4.pdf]

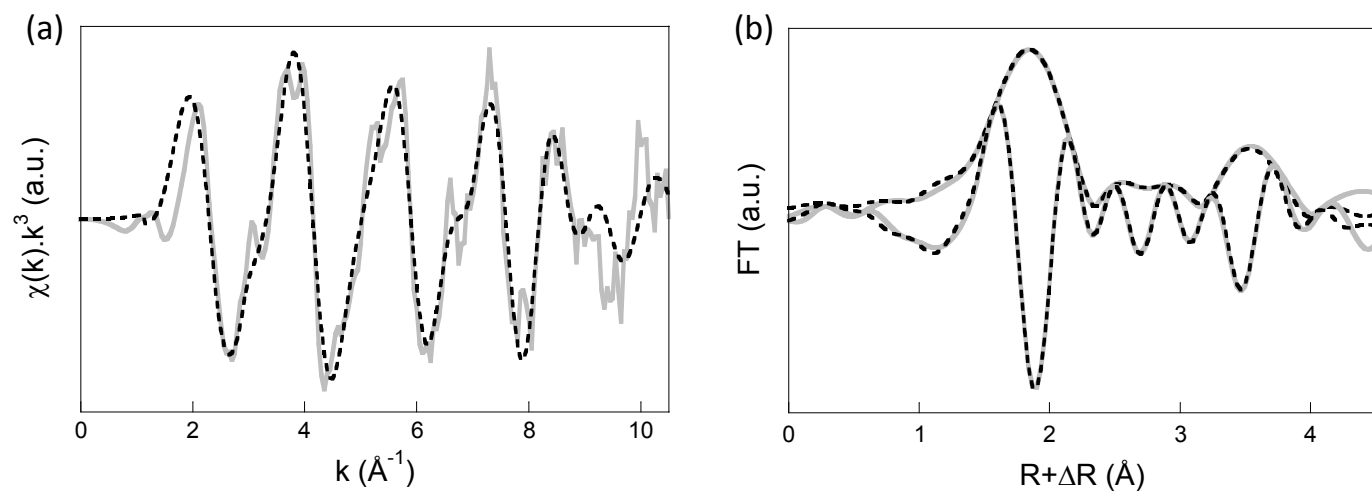

Figure SI 10 – (a) EXAFS signal and (b) Fourier transforms of calcite material. Solid lines are experimental data and dotted lines are the fit results.
