# Supplementary material for: How does calcium drive the structural organization of iron–organic matter aggregates? A multiscale investigation
Source: Royal Society of Chemistry journal article supplement (doi:10.1039/d0en00412j), 2020-01-01
Supplement: d0en00412j6.pdf [file d0en00412j6.pdf]

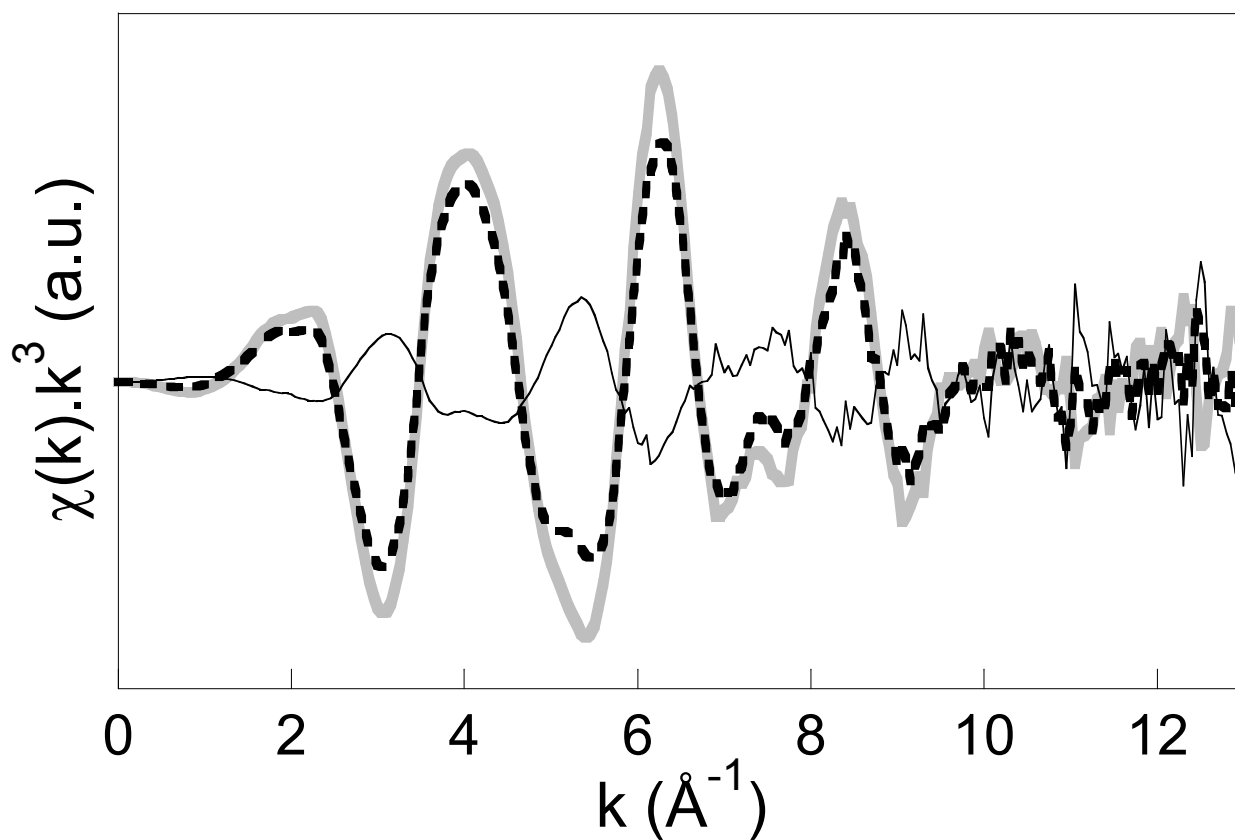

Figure SI 3 – EXAFS spectra of Fe(III)-Np (grey solid line), LCF results performing with Fe(III)-oligomer and Fh (black dotted line) and the residual of the fit (black thin solid line).
