# Supplementary figures and images for: How does calcium drive the structural organization of iron–organic matter aggregates? A multiscale investigation
Source: Royal Society of Chemistry journal article supplement (doi:10.1039/d0en00412j), 2020-01-01

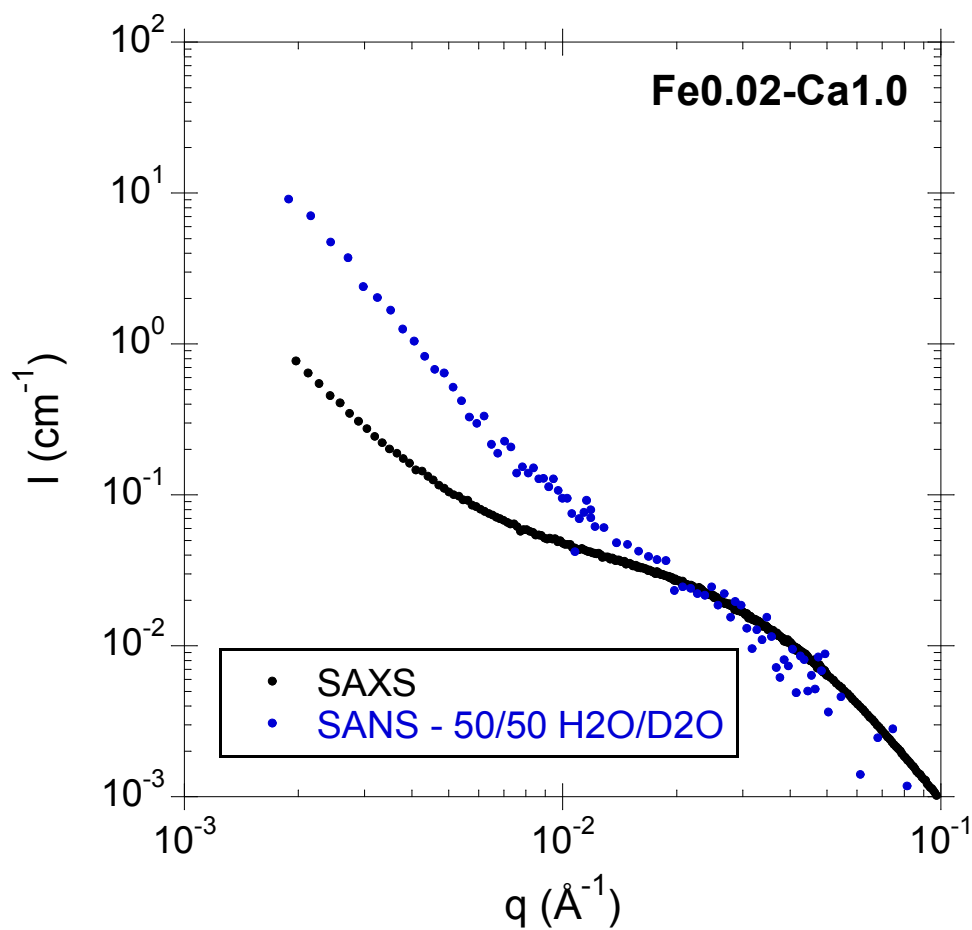

Figure SI 6 – SAXS curve (black) compared to SANS curve with contrast at 50/50 H<sub>2</sub>O/D<sub>2</sub>O (blue).

Supplement: d0en00412j9.pdf [file d0en00412j9.pdf]
